# Supplementary material for: Circumferential Pulmonary-Vein Ablation for Chronic Atrial Fibrillation
Source: Atypon-hosted journal article supplement (doi:10.1056/nejmoa050955), 2006-03-01
Supplement: nejm_oral_934sa1.pdf [file nejm_oral_934sa1.pdf]

## Supplementary Appendix

This appendix has been provided by the authors to give readers additional information about their work.

Supplement to: Oral H, Pappone C, Chugh A, et al. Circumferential pulmonary-vein ablation for chronic atrial fibrillation. *N Engl J Med* 2006;354:934-41.

**Appendix: Symptom Severity Questionnaire**

**Severity of Symptoms**

On a scale of 1 to 5 (1= none, 5= most severe), please rate the severity of the following symptoms:

1. Palpitations

1      2      3      4      5

2. Fatigue

1      2      3      4      5

3. Shortness of breath

1      2      3      4      5

4. Lightheadedness or dizziness

1      2      3      4      5

5. Lack of energy during exertion or exercise

1      2      3      4      5
